# Supplementary material for: Hierarchically porous CexZr1−xO2 materials prepared by solvent volatilization for highly efficient synthesis of DMC from CO2 and methanol
Source: Royal Society of Chemistry journal article supplement (doi:10.1039/d3nj00387f), 2023-01-01
Supplement: d3nj00387f1.pdf [file d3nj00387f1.pdf]

Supporting Information for

## Hierarchically porous $\text{Ce}_x\text{Zr}_{1-x}\text{O}_2$ prepared by solvent volatilization for high-efficient synthesis of DMC from $\text{CO}_2$ and methanol

Guanling Yang<sup>1</sup>, Haobo Wang<sup>1</sup>, Aizhong Jia<sup>1,2\*</sup>, Jingde Li<sup>1,2</sup> and Yanji Wang<sup>1,2</sup>

<sup>1</sup>Hebei Provincial Key Laboratory of Green Chemical Technology & High Efficient Energy Saving, Hebei University of Technology, Tianjin, P. R. China.

<sup>2</sup>Tianjin Key Laboratory of Chemical Process Safety, Tianjin, P. R. China.

\*Corresponding E-mail: azhjia@hebut.edu.cn

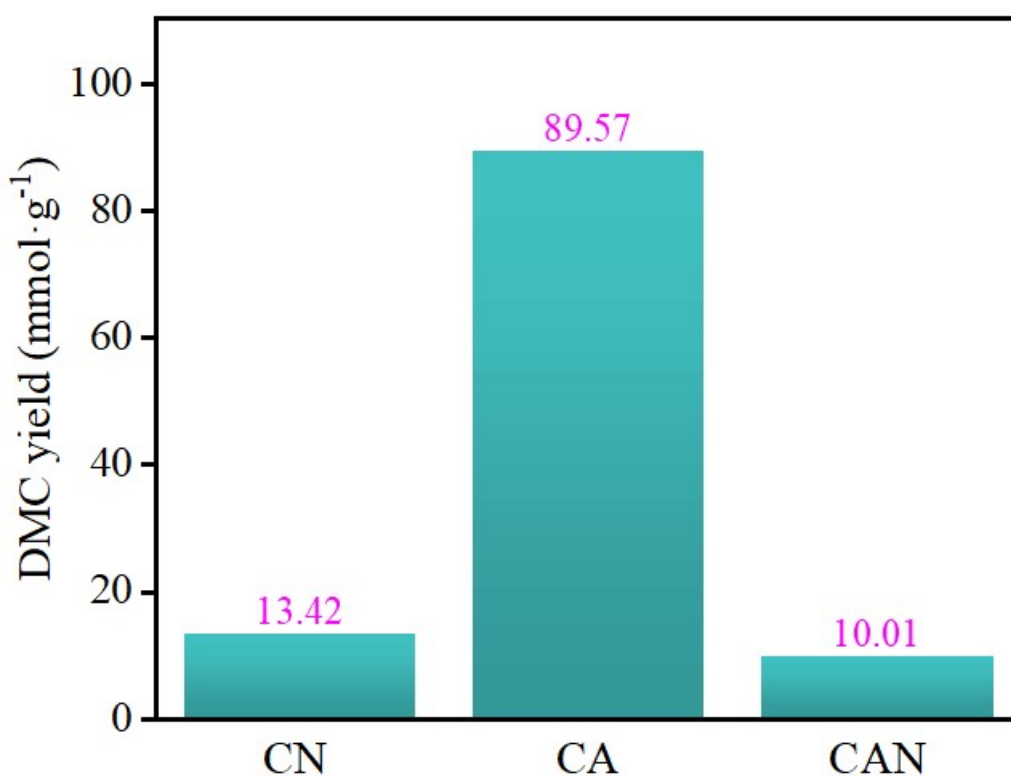

Fig. S1 Catalytic performance of CeO<sub>2</sub> catalysts prepared from different metal salts. (CN: cerium nitrate, CAN: cerium ammonium nitrate, CA: cerium acetate)

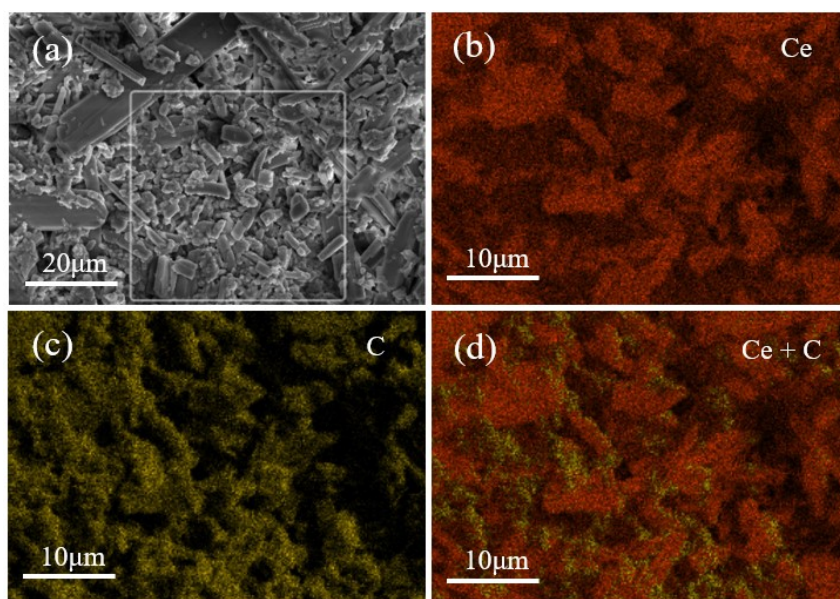

Fig. S2 The SEM mapping of the precursor of sample  $\text{Ce}_{0.9}\text{Zr}_{0.1}\text{O}_2$  prepared with cerium acetate as cerium source.

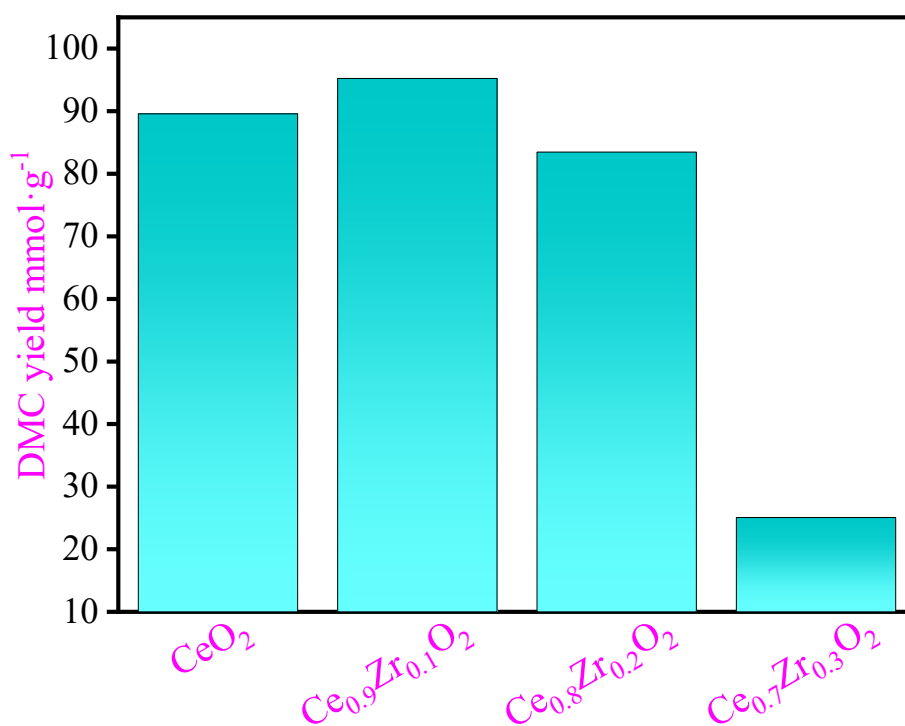

Fig. S3 Catalytic performance of  $\text{Ce}_x\text{Zr}_{1-x}\text{O}_2$  samples. Reaction conditions: catalyst 0.1 g,  $\text{CH}_3\text{OH}$  15mL, 2-CP 3g, 5h.

Tab. S1 The acid-basic properties of synthesized  $Ce_xZr_{1-x}O_2$  catalysts.

| Catalyst              | Basicity <sup>a</sup> ( $\mu\text{mol/g}$ ) |                    |                     |        | Acidity <sup>b</sup> ( $\mu\text{mol/g}$ ) |                    |                     |        |
|-----------------------|---------------------------------------------|--------------------|---------------------|--------|--------------------------------------------|--------------------|---------------------|--------|
|                       | $B_W$<br>( $<200^\circ$ )                   | $B_M$<br>(200~400) | $B_S$<br>( $>400$ ) | $B_T$  | $A_W$<br>( $<200$ )                        | $A_M$<br>(200~400) | $A_S$<br>( $>400$ ) | Total  |
| $CeO_2$               | 192.04                                      | 64.28              | 13.66               | 269.98 | 54.24                                      | 40.39              | 15.83               | 110.47 |
| $Ce_{0.9}Zr_{0.1}O_2$ | 235.85                                      | 80.87              | 5.63                | 322.35 | 63.3                                       | 40.69              | 17.84               | 113.03 |
| $Ce_{0.8}Zr_{0.2}O_2$ | 196.37                                      | 32.1               | 5.82                | 234.28 | 42.21                                      | 26.81              | 11.95               | 80.96  |
| $Ce_{0.7}Zr_{0.3}O_2$ | 190.86                                      | 24.06              | 6.42                | 221.33 | 27.12                                      | 18.01              | 8.01                | 53.14  |

<sup>a</sup> Calculated by  $CO_2$ -TPD; <sup>b</sup> Calculated by  $NH_3$ -TPD; <sup>c</sup> The unit of temperature is  $^\circ C$ .

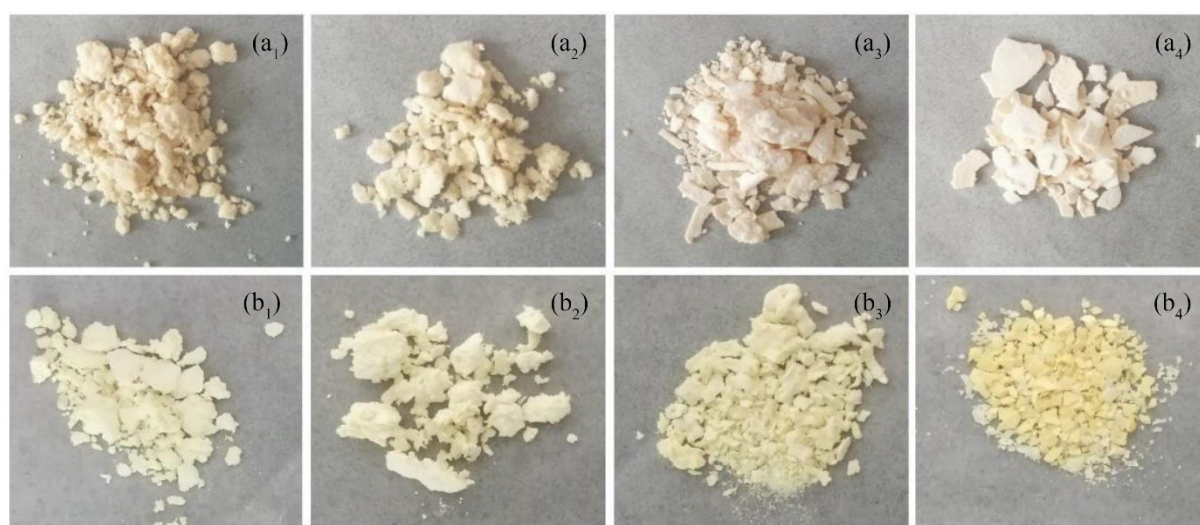

Fig. S4 The digital photographs of samples: (a<sub>1</sub>-a<sub>4</sub>)  $Ce_xZr_{1-x}O_2$  precursors and (b<sub>1</sub>-b<sub>4</sub>)  $Ce_xZr_{1-x}O_2$  materials (x=1-0.7, for the sample number from 1 to 4).

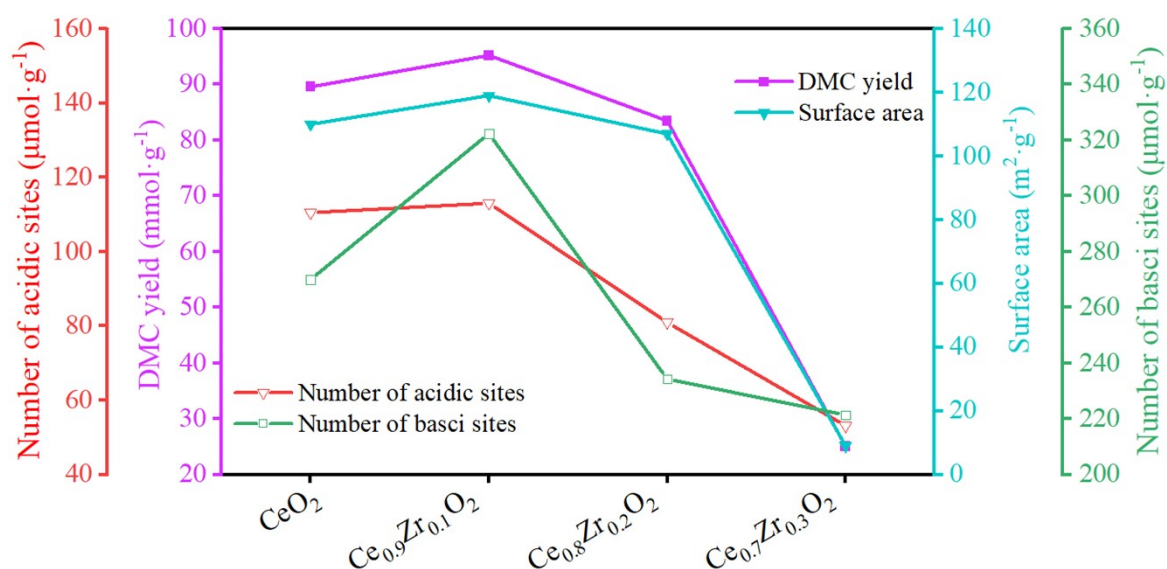

Fig. S5 The relationship between catalytic performance and acid-base site content of  $Ce_xZr_{1-x}O_2$ .

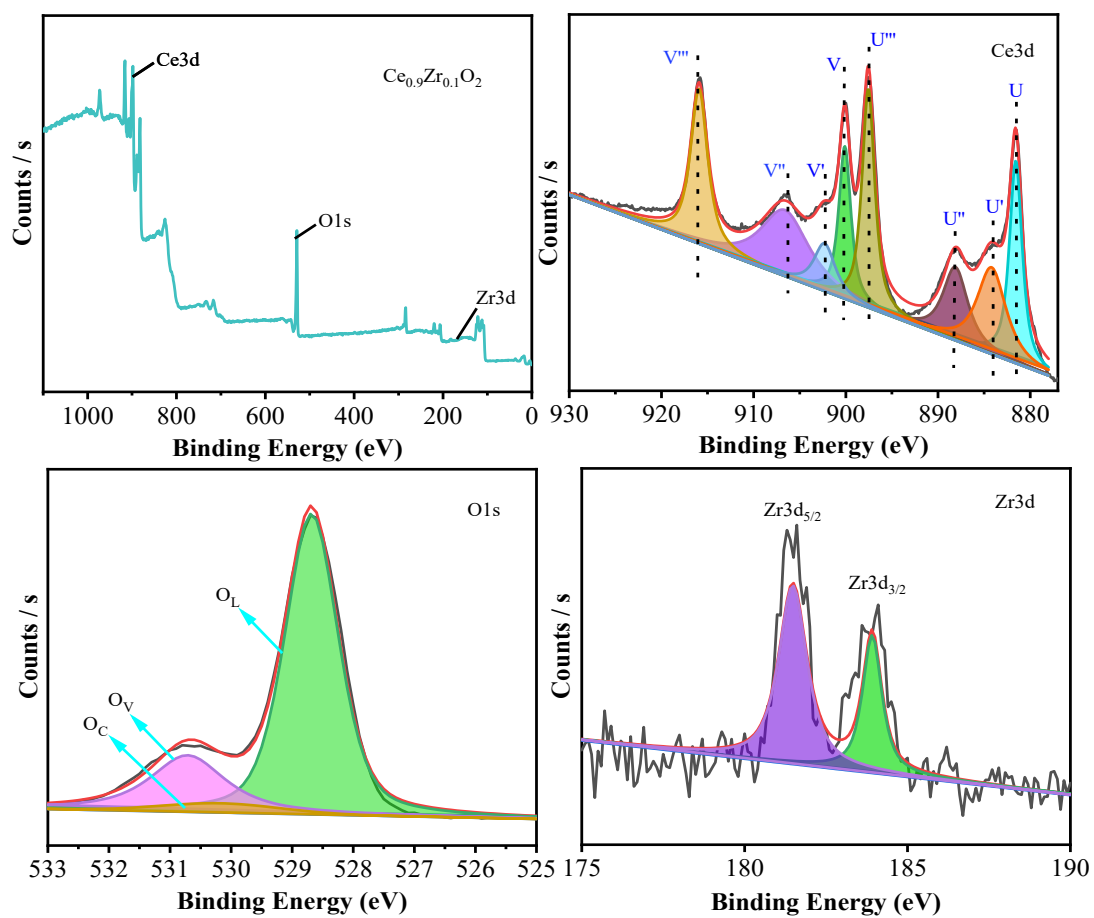

Fig. S6 XPS spectras of (a) full spectra; (b) Ce3d; (c) O1s and (d) Zr3d of  $\text{Ce}_{0.9}\text{Zr}_{0.1}\text{O}_2$ .
